# Supplementary material
Source: PubMed Central journal article supplement (PMC7244228)
Supplement: NIHMS1539568-supplement-Appendix_Table_1_.pdf [file NIHMS1539568-supplement-Appendix_Table_1_.pdf]

**Appendix Table 1. Drinking and HIV-related outcomes by treatment group**

| Outcome                                               | Integrated Stepped Alcohol Treatment, n=49 <sup>a</sup> | Treatment as Usual, n=46 <sup>a</sup> | Adjusted Treatment Effect (95% CI) ISAT vs. TAU <sup>b,c</sup> | P value <sup>b</sup> |
|-------------------------------------------------------|---------------------------------------------------------|---------------------------------------|----------------------------------------------------------------|----------------------|
| <b>Self-reported abstinence, n (%)</b>                |                                                         |                                       |                                                                |                      |
| Baseline                                              | 0/49 (0)                                                | 0/46 (0)                              | NA                                                             | NA                   |
| Week 24                                               | 16/42 (38.1)                                            | 9/39 (23.1)                           | 2.6 (0.8, 9.0)                                                 | 0.12                 |
| Week 52                                               | 13/40 (32.5)                                            | 13/36 (36.1)                          | 0.8 (0.3, 2.7)                                                 | 0.75                 |
| <b>Drinks per week, Lsmean (SD)</b>                   |                                                         |                                       |                                                                |                      |
| Baseline                                              | 3.4 (3.3)                                               | 3.6 (4.6)                             | NA                                                             | NA                   |
| Week 24                                               | 2.5 (6.1)                                               | 3.5 (8.2)                             | 0.3 (-2.0, 2.6)                                                | 0.79                 |
| Week 52                                               | 2.5 (4.8)                                               | 1.9 (3.1)                             | 0.2 (-1.2, 1.6)                                                | 0.75                 |
| <b>No heavy drinking days, n (%)<sup>d</sup></b>      |                                                         |                                       |                                                                |                      |
| Baseline                                              | 39/49 (79.6)                                            | 36/46 (78.3)                          | NA                                                             | NA                   |
| Week 24                                               | 34/42 (81.0)                                            | 35/39 (89.7)                          | 0.4 (0.1, 1.9)                                                 | 0.22                 |
| Week 52                                               | 35/40 (87.5)                                            | 32/36 (88.9)                          | 0.5 (0.1, 2.8)                                                 | 0.41                 |
| <b>Drinks per drinking day, Lsmean (SD)</b>           |                                                         |                                       |                                                                |                      |
| Baseline                                              | 2.3 (0.9)                                               | 2.0 (1.1)                             | NA                                                             | NA                   |
| Week 24                                               | 2.5 (2.0)                                               | 4.6 (18.0)                            | -2.0 (-6.7, 2.7)                                               | 0.39                 |
| Week 52                                               | 2.7 (2.2)                                               | 1.9 (1.3)                             | -7.7 (-23.2, 7.8)                                              | 0.32                 |
| <b>Percentage of days abstinent, Lsmean (SD)</b>      |                                                         |                                       |                                                                |                      |
| Baseline                                              | 79.2 (18.2)                                             | 76.0 (23.9)                           | NA                                                             | NA                   |
| Week 24                                               | 89.4 (17.7)                                             | 82.1 (25.4)                           | 2.1% (-3.6%, 7.7%)                                             | 0.47                 |
| Week 52                                               | 89.4 (16.7)                                             | 86.3 (19.2)                           | 1.6% (-6.1%, 9.3%)                                             | 0.68                 |
| <b>Abstinence by PEth, n (%)<sup>e</sup></b>          |                                                         |                                       |                                                                |                      |
| Baseline                                              | 19/49 (38.8)                                            | 20/43 (46.5)                          | NA                                                             | NA                   |
| Week 24                                               | 16/37 (43.2)                                            | 10/31 (32.3)                          | 1.8 (0.5, 6.3)                                                 | 0.34                 |
| <b>VACS Index, Lsmean (SD)<sup>f</sup></b>            |                                                         |                                       |                                                                |                      |
| Baseline                                              | 37.3 (19.4)                                             | 43.8 (21.9)                           | NA                                                             | NA                   |
| Week 24                                               | 35.9 (17.5)                                             | 42.1 (24.2)                           | 1.1 (-3.2, 5.5)                                                | 0.60                 |
| Week 52                                               | 37.8 (18.7)                                             | 41.4 (21.1)                           | 0.8 (-4.5, 6.1)                                                | 0.77                 |
| <b>Undetectable HIV viral load, n (%)<sup>g</sup></b> |                                                         |                                       |                                                                |                      |
| Baseline                                              | 36/49 (73.5)                                            | 32/45 (71.1)                          | NA                                                             |                      |
| Week 24                                               | 26/36 (72.2)                                            | 30/35 (85.7)                          | 0.3 (0.1, 1.3)                                                 | 0.09                 |
| Week 52                                               | 32/38 (84.2)                                            | 27/34 (79.4)                          | 1.7 (0.4, 8.4)                                                 | 0.49                 |
| <b>FIB-4</b>                                          |                                                         |                                       |                                                                |                      |
| Baseline                                              | 2.3(1.5)                                                | 2.7 (1.5)                             | NA                                                             |                      |
| Week 24                                               | 2.3 (1.7)                                               | 2.7 (1.8)                             | -0.2 (-0.9, 0.5)                                               | 0.52                 |
| Week 52                                               | 2.5 (2.0)                                               | 3.2 (2.5)                             | -0.6 (-1.6, 0.4)                                               | 0.22                 |
| <b>Alanine aminotransferase</b>                       |                                                         |                                       |                                                                |                      |
| Baseline                                              | 52.550.5                                                | 45.2 (29.4)                           | NA                                                             |                      |

|                                   |             |             |              |      |
|-----------------------------------|-------------|-------------|--------------|------|
| Week 24                           | 35.333.6    | 45.8 (41.0) | -7 (-20, 7)  | 0.32 |
| Week 52                           | 35.526.3    | 52.6 (67.5) | -19 (-42, 4) | 0.10 |
| <b>Aspartate aminotransferase</b> |             |             |              |      |
| Baseline                          | 48 (31.4)   | 47.8 (26.2) | NA           |      |
| Week 24                           | 36.7 (33.6) | 45.7 (29.7) | -4 (-15, 7)  | 0.45 |
| Week 52                           | 39.5 (23.2) | 57.9 (57.4) | -17 (-36, 2) | 0.08 |

a. Unadjusted estimates

b. Estimates based on results from linear mixed effects models for continuous outcomes and generalized linear mixed effects models for binary outcomes. For binary variables, treatment effects are expressed as an adjusted odds ratio.

c. Values adjusted for baseline assessment, baseline VACS Index and site (except PEth focused analyses only adjusted for baseline assessment and VACS index)

d. No heavy drinking defined as the absence of any heavy drinking days in the past 30 days, where a heavy drinking days is defined for men  $\geq 5$  drinks per day and for women as  $\geq 4$  drinks per day.

e. PEth = phosphatidylethanol, an alcohol biomarker reflecting alcohol use over the past 21 days and higher scores are associated with higher levels of alcohol use. PEth  $< 8$  ng/mL consistent with abstinence or near abstinence.<sup>41</sup>

f. VACS Index is a validated measure of morbidity and mortality based on age, HIV biomarkers (CD4 cell count, HIV viral load), hemoglobin, FIB-4 score (a measure of liver fibrosis calculated based on aspartate and alanine aminotransferase and platelet count), creatinine and hepatitis C status. Scores range from 0 to 164; each 5 point increase is associated with a 20% increase in 5 year mortality risk.<sup>7,57</sup>

g. Undetectable HIV viral load was based on the limit of detection and defined as  $< 50$  copies/mL.
